# Supplementary material
Source: PubMed Central journal article supplement (PMC3910884)

## **Materials and Methods**

### **Search Strategy**

The strategy employed for the search in MEDLINE included the terms “daptomycin” and “enterococcus” as medical subject headings (MeSH) and “linezolid” as supplementary term. Similarly, a computerized literature search was performed in EMBASE using the terms “daptomycin”, “linezolid” and “enterococcus” as Emtree thesaurus terms. To maximize the sensitivity of the search strategy, a number of synonyms of the above terms were entered as free-text terms in the electronic databases CENTRAL, ISI Web of Science and SCOPUS as appropriate (Table S1). No language limitations were applied. The citation lists of the retrieved articles were also hand-searched.

In addition, we screened the abstracts of the following major annual conferences in the field between 01/01/2003 and 31/08/2012: the Annual Meeting of Infectious Diseases Society of America (IDSA), the Interscience Conference on Antimicrobial Agents and Chemotherapy (ICAAC), the European Congress of Clinical Microbiology and Infectious Diseases (ECCMID) and the International Congress on Infectious Diseases (ICID). In order to include results about ongoing, as well as completed, relevant clinical trials, the registry for clinical trials of the United States National Institutes of Health (<http://www.clinicaltrials.gov>), the European Clinical Trials Register of the European Medicines Agency (<https://clinicaltrialsregister.eu>), the Australian New Zealand Clinical Trials Registry (<http://www.anzctr.org.au>) and the International Clinical Trials Registry Platform Search Portal of the World Health Organization (<http://www.who.int/ictrp/en>) were also searched, using the terms “enterococcus”, “daptomycin” and “linezolid”.

## **Data extraction**

The following data were extracted from each study: demographic (citation data, country of origin, study period, number of patients in the daptomycin and linezolid groups), methodological (design, number participating centres, inclusion and exclusion criteria, imbalances in potential confounders and method of adjustment for them, covariates included in the model) and procedural (dose, duration of treatment, combination with another anti-VRE agent, adverse events). Any disagreement was resolved by discussion and was referred to the senior investigator (SM).

All authors were contacted in order to further clarify issues regarding the data provided in the studies included in this systematic review. Communication was established with the authors of eight studies (1-8) and answers were provided for three studies (5, 6, 8).

## **Quantitative data synthesis**

The dichotomous data results from each study were expressed as odds ratio (OR) with 95% confidence intervals (CI). These results were combined for meta-analysis using the Mantel/Haenszel model (when using the fixed effects method) and the DerSimonian and Laird method (when using the random effects method).

All results were combined for meta-analysis using the Revman Software (Version 5.1, Copenhagen, The Cochrane Collaboration, 2011). Study-to-study variation was assessed by using the Chi<sup>2</sup> statistic (the hypothesis tested was that the studies were all drawn from populations with the same effect size). A fixed effects model was used when no statistically significant heterogeneity was present, while in the presence of significant heterogeneity ( $p < 0.05$ ), a random effects model was applied. A funnel plot analysis and Egger's test were performed, in order to detect the presence of publication bias.

A sensitivity analysis was *a priori* planned to be carried out by combining odds ratios for mortality adjusted for important confounders as identified by the authors of the individual studies through multivariate logistic regression analyses. An additional sensitivity analysis was performed by removing the studies that included patients switched from daptomycin to linezolid or vice-versa (cross-over patients).

## References

1. **McKinnell JA, Patel M, Shirley RM, Kunz DF, Moser SA, and Baddley JW.** 2011. Observational study of the epidemiology and outcomes of vancomycin-resistant *Enterococcus* bacteremia treated with newer antimicrobial agents. *Epidemiol. Infect.* **139**:1342–1350.
2. **Twilla JD, Finch CK, Utery JB, Gelfand MS, Hudson JQ, and Broyles JE.** 2012. Vancomycin-resistant *Enterococcus* bacteremia: an evaluation of treatment with linezolid or daptomycin. *J. Hosp. Med.* **7**:243-248.
3. **Bio LL, Perez ME, MacDougall C, and Gallagher JC.** 2011. Comparison of linezolid and daptomycin in the treatment of vancomycin-resistant enterococcal bacteremia. *Infect. Dis. Clin. Pract.* **19**:343–347.
4. **Crank CW, Scheetz MH, Brielmaier B, Rose WE, Patel GP, Ritchie DJ, and Segreti J.** 2010. Comparison of outcomes from daptomycin or linezolid treatment for vancomycin-resistant enterococcal bloodstream infection: A retrospective, multicenter, cohort study. *Clin. Ther.* **32**:1713–1719.
5. **Dubrovskaya Y, Kubin CJ, and Furuya EY.** 2008. Daptomycin (D) Compared to Linezolid (L) for Primary Treatment of Vancomycin-Resistant Enterococcal Bacteremia (VREB). Abstr. Joint 48th Intersci. Conf. Antimicrob. Agents Chemother. and 46th Infectious Diseases Society of America Annual Meeting, abstr K-3443.
6. **Furuya EY, Kubin C, Yin M, Lowy FD, Della-Latta P, and Hammer S.** 2005. Daptomycin Experience and Comparison with Linezolid for the Treatment of Vancomycin-Resistant Enterococcal Bacteremia., Abstr. 45th Intersci. Conf. Antimicrob. Agents Chemother., abstr K-2116.
7. **Marion C, Kennedy L, and High K.** 2008. Daptomycin or Linezolid in the Treatment of Vancomycin Resistant Enterococcal Bacteremia in Neutropenic Cancer Patients., Abstr. Joint 48th Intersci. Conf. Antimicrob. Agents Chemother. and 46th Infectious Diseases Society of America Annual Meeting, abstr L-2120.
8. **Mave V, Garcia-Diaz J, Islam T, and Hasbun R.** 2009. Vancomycin-resistant enterococcal bacteremia: Is daptomycin as effective as linezolid? *J. Antimicrob. Chemother.* **64**:175–180.

9. **El-Lababidi RM, Topal J, and Tsukerman M.** 2007. Daptomycin and Linezolid in the Treatment of Vancomycin-Resistant Enterococcal Bacteremia: A Retrospective Analysis of Treatment Outcomes., Abstr. 45th Annual Meeting of the Infectious Diseases Society of America, abstr 1095.
10. **Kraft S, MacKler E, Schlickman P, Welch K, and Depestel DD.** 2011. Outcomes of therapy: Vancomycin-resistant enterococcal bacteremia in hematology and bone marrow transplant patients. Support. Care Cancer **19**:1969–1974.

**Table S1. Search strategy used for the identification of eligible studies in electronic databases that free-text terms were used**

|              | Intervention                                                                                                     |     |                                                                                                                                         | AND | Pathogen                                                                 |
|--------------|------------------------------------------------------------------------------------------------------------------|-----|-----------------------------------------------------------------------------------------------------------------------------------------|-----|--------------------------------------------------------------------------|
|              | daptomycin                                                                                                       | AND | Linezolid                                                                                                                               |     |                                                                          |
| <b>Terms</b> | (daptom*) OR (deptom*) OR (cubicin*) OR (cidecin*) OR<br>(dapcin*) OR ('ly 146032') OR (ly146032) OR (ly-146032) | AND | (linezolid) OR (zyvox*) OR (linospan) OR ('u 100766') OR<br>(u100766) OR (u-100766) OR ('pnu 100766') OR<br>(pnu100766) OR (pnu-100766) | AND | (enterococ*) OR ( <i>e. faecium</i> ) OR ( <i>e. faecalis</i> ) OR (vre) |

The asterisk (\*) stands for any one or more character and has been used where available to increase the sensitivity of the search.

**Table S2. Main characteristics of the studies comparing linezolid to daptomycin for the treatment of VRE bacteremia**

| Study, country of origin, journal or meeting                            | Study period                   | Study design, No of centers         | Number of patients (D/L) | Inclusion criteria                                                                                                                                       | Exclusion criteria                                                                                                                                                            |
|-------------------------------------------------------------------------|--------------------------------|-------------------------------------|--------------------------|----------------------------------------------------------------------------------------------------------------------------------------------------------|-------------------------------------------------------------------------------------------------------------------------------------------------------------------------------|
| Furuya et al, 2005, USA, Abstract 45 <sup>th</sup> ICAAC(6)             | 2004 – 2005                    | Retrospective cohort, single center | 14/40                    | Patients with VRE bacteremia<br>Administration of daptomycin for $\geq$ 48h                                                                              | Not reported                                                                                                                                                                  |
| El-Lababidi et al, 2007, USA, Abstract 45 <sup>th</sup> IDSA Meeting(9) | January 2000 – December 2006   | Retrospective cohort, single center | 28/28                    | Patients with VRE bacteremia                                                                                                                             | Not reported                                                                                                                                                                  |
| Dubrovskaya et al, 2008, USA, Abstract 48 <sup>th</sup> ICAAC(5)        | January 2005 – December 2007   | Retrospective cohort, single center | 40/40                    | Adult patients with VRE bacteremia<br>Daptomycin or Linezolid as initial treatment for $\geq$ 48h                                                        | Not reported                                                                                                                                                                  |
| Marion et al, 2008, USA, Abstract 48 <sup>th</sup> ICAAC(7)             | June 2005 – July 2007          | Retrospective cohort, not reported  | 21/10                    | Febrile cancer neutropenic patients with VRE bacteremia                                                                                                  | Not reported                                                                                                                                                                  |
| Mave et al, 2009, USA, J Antimicrob Chemother(8)                        | September 2003 – December 2007 | Retrospective cohort, multicenter   | 30/ 68                   | Patients with VRE bacteremia<br>Age>18 years                                                                                                             | VRE BSI susceptible to ampicillin or treatment with other antimicrobial or patient not considered to have true bacteremia                                                     |
| Crank et al, 2010, USA, Clin Ther(4)                                    | September 2003 – June 2007     | Retrospective cohort, multicenter   | 67/34                    | Hospitalized patients with VRE bacteremia<br>Age $\geq$ 18years                                                                                          | Patients with polymicrobial bacteremia                                                                                                                                        |
| McKinnell et al, 2011, USA, Epidemiol Infect(1)                         | January 2005– July 2008        | Retrospective cohort, single center | 86/104                   | All patients with VRE bacteremia<br>Treatment with daptomycin or linezolid for $\geq$ 3days of the initial 4 days of VRE treatment                       | Not reported                                                                                                                                                                  |
| Kraft et al, 2011, USA, Support Care Cancer(10)                         | January 2004 – December 2006   | Retrospective cohort, single center | 43/29                    | Hematology or bone marrow transplant service patients with VRE bacteremia<br>Age>18 years<br>Daptomycin or Linezolid as initial treatment for $\geq$ 48h | None reported                                                                                                                                                                 |
| Bio et al, 2011, USA Infect Dis Clin Pract(3)                           | January 2004 – March 2008      | Retrospective cohort, single center | 37/47                    | Patients with VRE bacteremia<br>Age>18 years                                                                                                             | Follow-up cultures not performed or repeated cultures negative for VRE before the initiation of treatment or concurrent antibiotic active against VRE or treatment for<3 days |
| Twilla et al, 2012, USA, J Hosp Med(2)                                  | January 2004 – July 2009       | Retrospective cohort, single center | 63/138                   | Patients with VRE bacteremia<br>Age $\geq$ 18 years<br>Daptomycin or Linezolid for $\geq$ 5days                                                          | Simultaneously treated with more than one agent active against VRE                                                                                                            |

Abbreviations: D, Daptomycin; L: Linezolid; VRE, Vancomycin-resistant Enterococcus.



**Table S3. Confounders identified in the studies comparing linezolid versus daptomycin for the treatment of VRE bacteremias and their adjustment**

| Study                 | Statistically significant differences in potential confounders                                                                                                       |                                      | Adjustment for potential confounders |                                                                                                                                                                                                                                                                           |
|-----------------------|----------------------------------------------------------------------------------------------------------------------------------------------------------------------|--------------------------------------|--------------------------------------|---------------------------------------------------------------------------------------------------------------------------------------------------------------------------------------------------------------------------------------------------------------------------|
|                       | Increased in the daptomycin group                                                                                                                                    | Increased in the linezolid group     | Method of adjustment                 | Co-variables included in the model                                                                                                                                                                                                                                        |
| Furuya et al.(6)      | Not reported                                                                                                                                                         | Not reported                         | Logistic regression                  | Age, immunocompromise, ICU location                                                                                                                                                                                                                                       |
| El-Lababidi et al.(9) | Patients that received chemotherapy                                                                                                                                  | None                                 | No                                   | n/a                                                                                                                                                                                                                                                                       |
| Dubrovskaya et al.(5) | Patients with hematologic malignancies<br>Neutropenic patients within the past 30 days<br>Thrombocytopenic patients<br>Patients in need of renal replacement therapy | None                                 | Logistic regression                  | Solid malignancy, APACHE II                                                                                                                                                                                                                                               |
| Marion et al.(7)      | Not reported                                                                                                                                                         | Not reported                         | No                                   | n/a                                                                                                                                                                                                                                                                       |
| Mave et al.(8)        | ICU patients                                                                                                                                                         | None                                 | Logistic regression                  | Age, gender, race, concomitant use of aminoglycosides, CCI, APACHE II                                                                                                                                                                                                     |
| Crank et al.(4)       | Patients presenting with shock,<br>Patients having received previous vancomycin or linezolid treatment                                                               | None                                 | Logistic regression                  | Source of infection, enterococcal species, presence of acute renal failure, mechanical ventilation, ICU stay, presence of shock, infective endocarditis, renal replacement therapy, concurrent Tx with gentamicin or rifampin, previous vancomycin or linezolid treatment |
| McKinnell et al.(1)   | Neutropenic patients                                                                                                                                                 | None                                 | Logistic regression                  | Mechanical ventilation, renal insufficiency, timing of antibiotics, transplant                                                                                                                                                                                            |
| Kraft et al.(10)      | Bone marrow transplant patients                                                                                                                                      | Patients with acute myeloid leukemia | No                                   | n/a                                                                                                                                                                                                                                                                       |
| Bio et al.(3)         | Thrombocytopenic patients                                                                                                                                            | ICU patients                         | Logistic regression                  | Age, APACHE II, venous catheter removal, ICU stay                                                                                                                                                                                                                         |
| Twillia et al.(2)     | Patients with hematologic malignancies and liver transplants                                                                                                         | Older patients                       | No                                   | n/a                                                                                                                                                                                                                                                                       |

Abbreviations: ICU, Intensive Care Unit; n/a, not applicable; APACHE II, Acute Physiology and Chronic Health Evaluation II; CCI, Charlson co-morbidity index; Tx, Therapy.

**Table S4. Dosages, treatment durations and adverse events in the studies comparing linezolid versus daptomycin for the treatment of VRE bacteremia**

| Study                 | Daptomycin                                                                              |                          |                       |                                                                                                                                      | Linezolid     |                          |                       |                                                                                                                                      |
|-----------------------|-----------------------------------------------------------------------------------------|--------------------------|-----------------------|--------------------------------------------------------------------------------------------------------------------------------------|---------------|--------------------------|-----------------------|--------------------------------------------------------------------------------------------------------------------------------------|
|                       | Daily dose (Median; range)                                                              | Duration (Median; range) | Combination treatment | Adverse Events                                                                                                                       | Daily dose    | Duration (Median; range) | Combination treatment | Adverse Events                                                                                                                       |
| Furuya et al.(6)      | Not reported                                                                            | Not reported             | Not reported          | Not reported                                                                                                                         | Not reported  | Not reported             | Not reported          | Not reported                                                                                                                         |
| El-Lababidi et al.(9) | Not reported                                                                            | Not reported             | Not reported          | None                                                                                                                                 | Not reported  | Not reported             | Not reported          | Thrombocytopenia 14%<br>Pancytopenia 7%                                                                                              |
| Dubrovskaya et al.(5) | 6 mg/kg; 4-9                                                                            | 15 days; not reported    | Not reported          | Thrombocytopenia                                                                                                                     | Not reported  | 15 days; not reported    | Not reported          | Thrombocytopenia                                                                                                                     |
| Marion et al.(7)      | 6 mg/kg; fixed dose                                                                     | Not reported             | Not reported          | Not reported                                                                                                                         | 600 mg b.i.d  | Not reported             | Not reported          | Not reported                                                                                                                         |
| Mave et al.(8)        | 6 mg/kg; fixed dose                                                                     | 14 days; 2-42            | Aminoglycosides 46.7% | Anaemia 10%<br>Thrombocytopenia 10%<br>Renal insufficiency 10%                                                                       | 600 mg b.i.d. | 14 days; 2-42            | Aminoglycosides 58.8% | Anaemia 11.8%<br>Thrombocytopenia 11.8%<br>Renal insufficiency 5.9%                                                                  |
| Crank et al.(4)       | 6 mg/kg; 4-8                                                                            | Not reported             | Gentamicin 14.9%      | Not reported                                                                                                                         | 600 mg b.i.d. | Not reported             | None                  | Not reported                                                                                                                         |
| McKinnell et al.(1)   | Not reported                                                                            | Not reported             | Not reported          | Not reported                                                                                                                         | Not reported  | Not reported             | Not reported          | Not reported                                                                                                                         |
| Kraft et al.(10)      | 5.5 mg/kg; 4.5-6                                                                        | 13 days; 8.5-14          | Not reported          | Neutropenia: proportion not reported<br>Thrombocytopenia: proportion not reported<br>Renal insufficiency 9.3%<br>LFTs>2times ULN 14% | 600 mg b.i.d  | 11.5 days; 7-14          | Not reported          | Neutropenia: proportion not reported<br>Thrombocytopenia: proportion not reported<br>Renal insufficiency 7%<br>LFTs>2times ULN 34.5% |
| Bio et al.(3)         | 6 mg/kg; 3.7-8.8 in patients with creatinine clearance <30ml/min administered every 48h | 13 days; 3-91            | No                    | Thrombocytopenia during therapy 6.3%<br>CK elevation during therapy 5.4%                                                             | 600 mg b.i.d  | 11 days; 3-62            | No                    | Thrombocytopenia during therapy 18.4%<br>CK elevation during therapy 4.3%                                                            |
| Twilla et al.(2)      | 6 mg/kg; 3.4-10.4                                                                       | Not reported             | No                    | Not reported                                                                                                                         | 600 mg b.i.d  | Not reported             | No                    | Not reported                                                                                                                         |

Abbreviations: b.i.d, twice a day; LFTs, Liver function tests; ULN, Upper limit of normal; CPK: creatine phosphokinase.

**Table S5. Pooled analysis of adverse events in patients treated with daptomycin compared to those treated with linezolid for VRE bacteremia**

| Adverse events      | No studies | Sample size | Method applied                               | Effect size, 95% CI     |
|---------------------|------------|-------------|----------------------------------------------|-------------------------|
| Anaemia             | 1          | 98          | Fixed effects model, heterogeneity: n/a      | OR: 0.83, (0.20, 3.39)  |
| Thrombocytopenia    | 3          | 208         | Fixed effects model, heterogeneity: $p=0.37$ | OR: 0.41, (0.14, 1.18)  |
| Pancytopenia        | 1          | 56          | Fixed effects model, heterogeneity: n/a      | OR: 0.19, (0.01, 4.05)  |
| Renal insufficiency | 2          | 170         | Fixed effects model, heterogeneity: $p=0.84$ | OR: 1.58, (0.49, 5.15)  |
| Elevated CPK        | 2          | 172         | Fixed effects model, heterogeneity: n/a      | OR: 1.33, (0.18, 10.01) |
| LFTs > 2 times ULN  | 1          | 72          | Fixed effects model, heterogeneity: n/a      | OR: 0.31, (0.10, 0.98)  |

Abbreviations: CI, Confidence interval; n/a, not applicable; OR, Odds ratio; CPK: creatine phosphokinase; LFTs, Liver function tests; ULN, Upper limit of normal

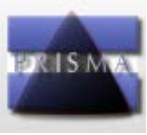

**Figure S1**  
**PRISMA 2009 Flow Diagram**

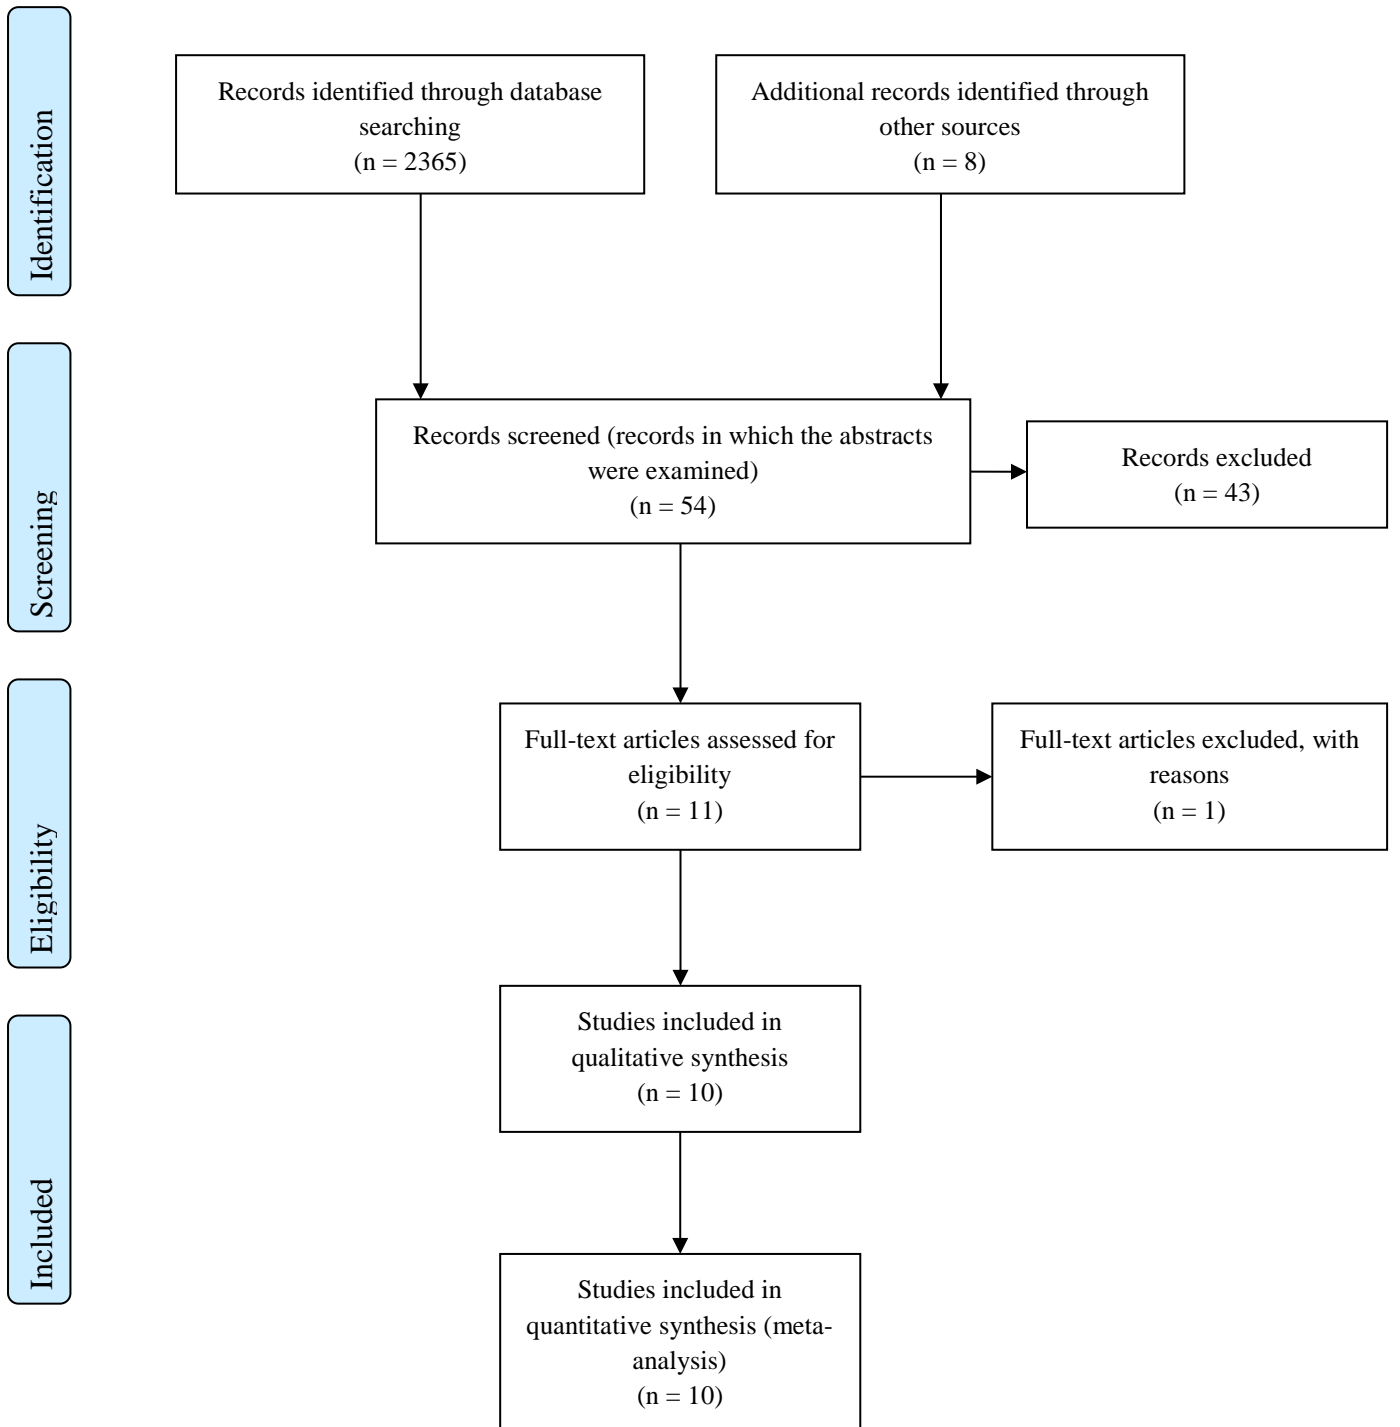

Supplement: AAC.01289-13_zac002142530so1.pdf [file AAC.01289-13_zac002142530so1.pdf]
